# Supplementary material for: Structural growth pattern of neutral and negatively charged yttrium-doped silicon clusters YSin0/− (n=6–20): from linked to encapsulated structures
Source: Royal Society of Chemistry journal article supplement (doi:10.1039/c8ra09492f), 2019-01-01
Supplement: c8ra09492f1.pdf [file c8ra09492f1.pdf]

## Supplementary Information

### Structural growth pattern of neutral and negatively charged yttrium-doped silicon clusters $\text{YSi}_n^{0/-}$ ( $n=6-20$ ): from linked to encapsulated structures

Yuming Liu,<sup>a</sup> Jucai Yang,<sup>\*a,b</sup> Suying Li,<sup>b</sup> Lin Cheng<sup>a\*</sup>

<sup>a</sup> School of Chemical Engineering, Inner Mongolia University of Technology, and Inner Mongolia Key Laboratory of Theoretical and Computational Chemistry Simulation, Hohhot 010051, Peoples Republic of China

<sup>b</sup> School of Energy and Power Engineering, Inner Mongolia University of Technology, Hohhot 010051, Peoples Republic of China

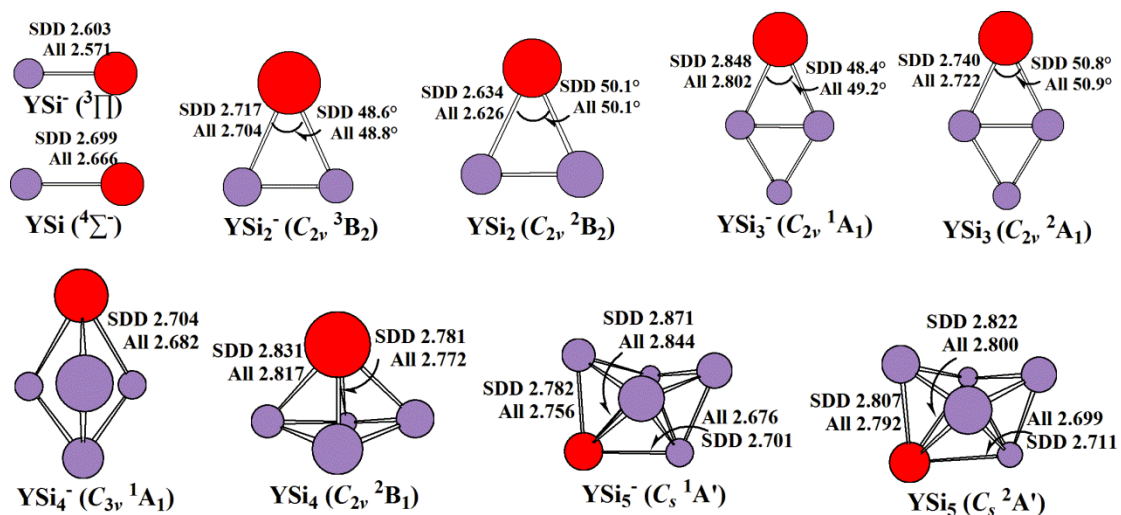

**Figure S1.** The ground state structures of neutral  $\text{YSi}_n$  ( $n=1-5$ ) and their anions obtained at mPW2PLYP level. Bond distances are in Å. “SDD” indicates that the structural parameters are obtained with SDD basis set for Y atoms, while “All” indicates that the structural parameters are obtained with all-electron TZP basis set for Y atoms. The basis set for Si atoms is cc-pVTZ. The fifteen SDD Y-Si bond distances are averagely longer than those of all-electron TZP basis set by 0.021 Å.

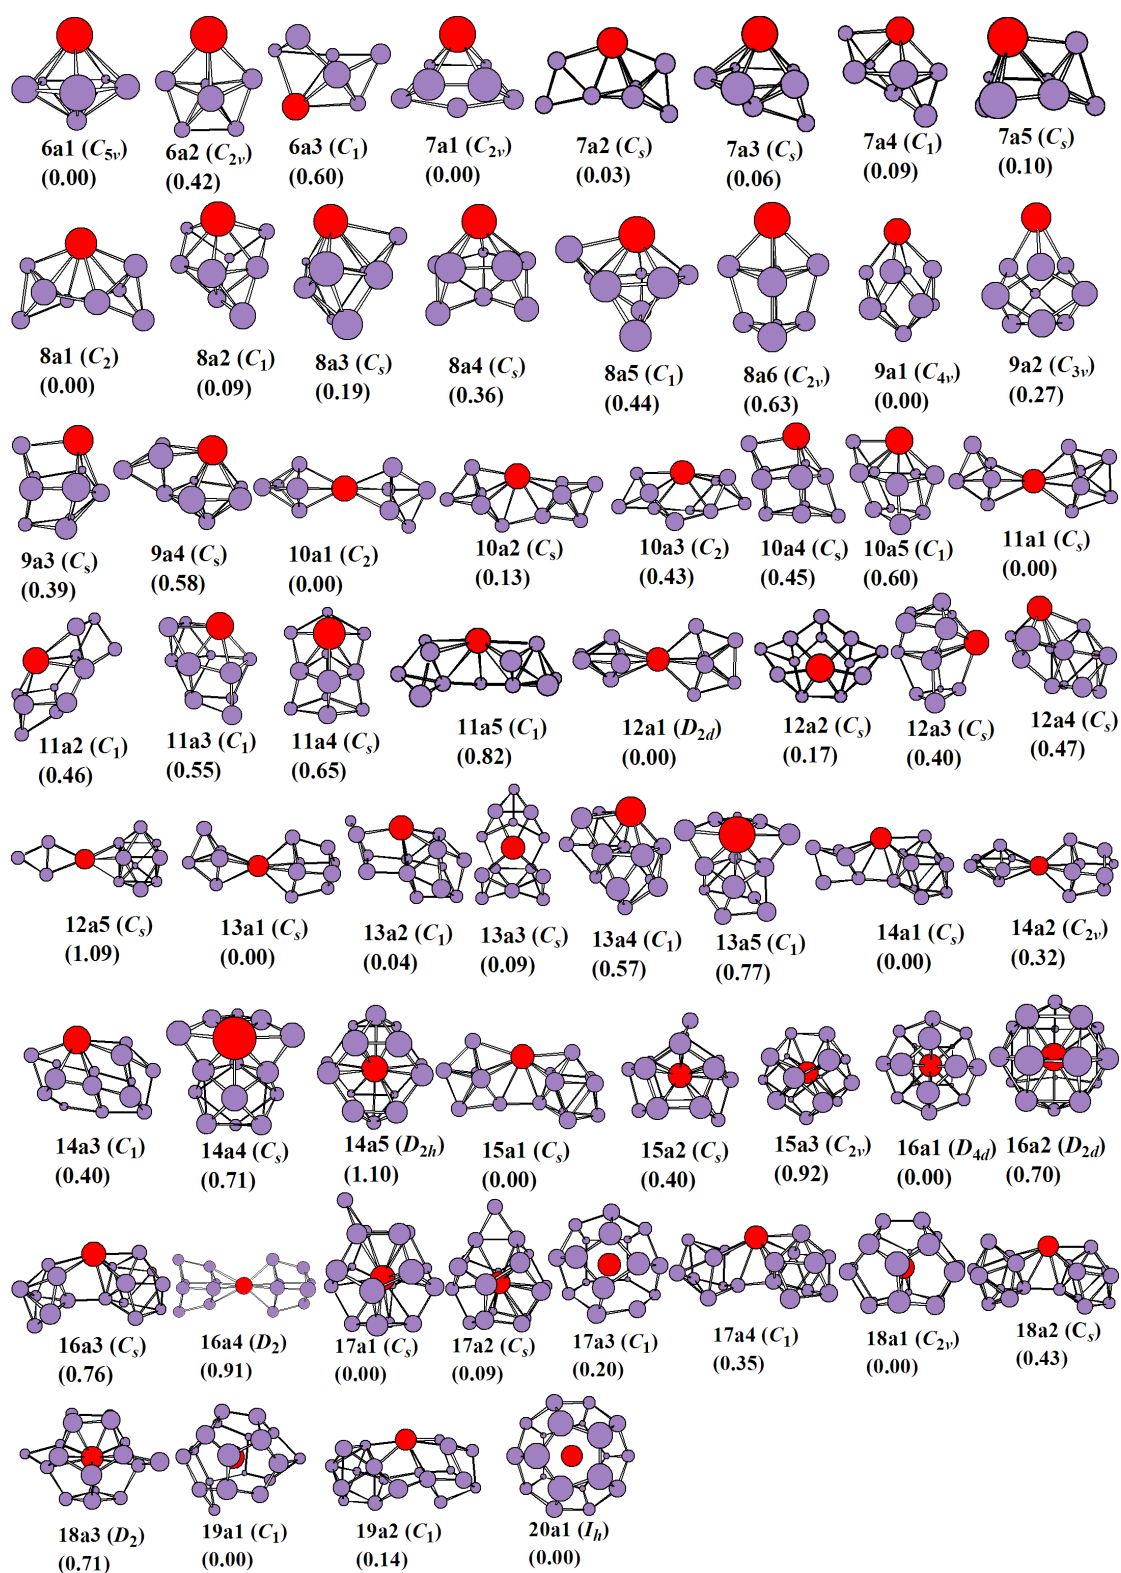

**Figure S2.** Low-lying isomers of anion  $\text{YSi}_n^-$  ( $n=6-20$ ) clusters, point group and relative energy (in eV).

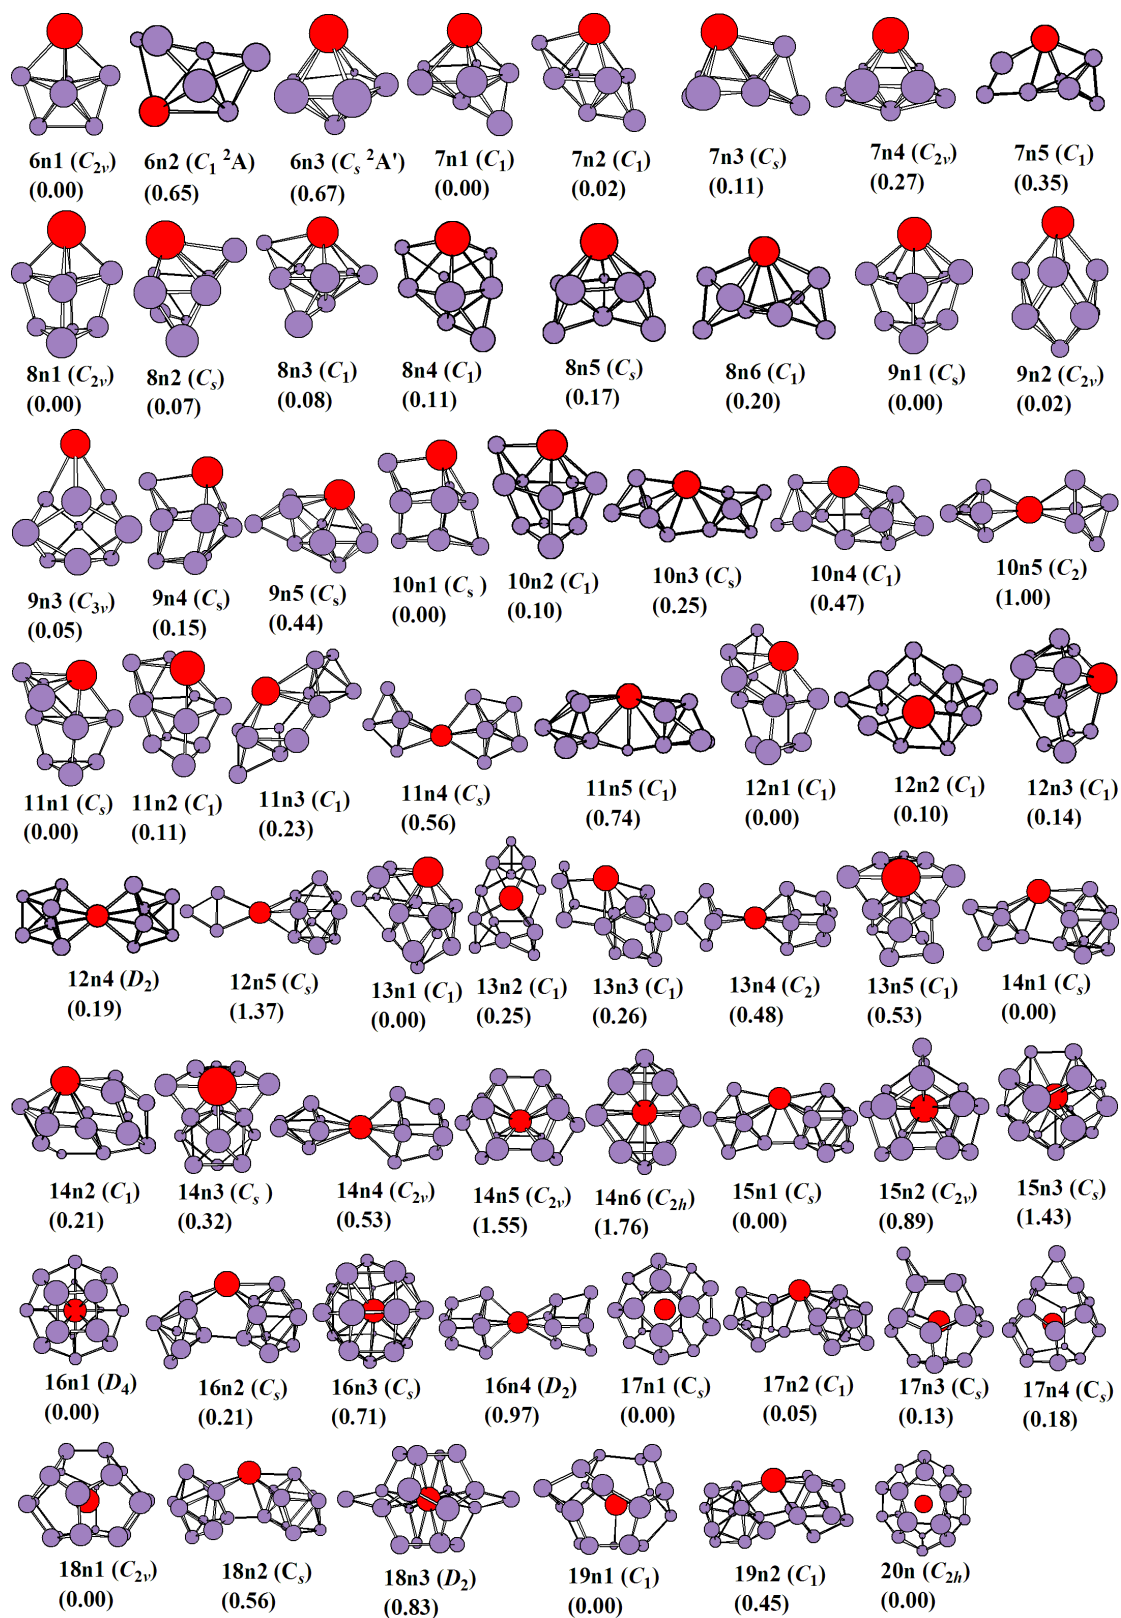

**Figure S3.** Low-lying isomers of neutral  $YSi_n$  ( $n=6-20$ ) clusters, point group and relative energy (in eV).

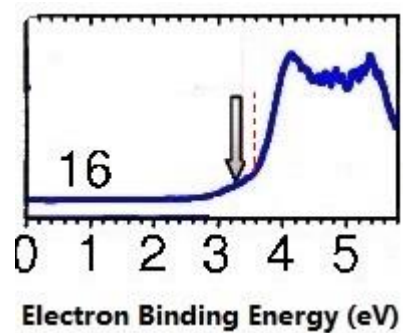

Figure S4. Photoelectron spectra of  $\text{YSi}_{16}^-$  taken from Reference 2. Black arrow pointed to the original AEA and red dashed line pointed to the new AEA.
